# Supplementary material for: The impact of leopards (Panthera pardus) on livestock losses and human injuries in a human-use landscape in Maharashtra, India
Source: PeerJ. 2020 Mar 26;8:e8405. doi: 10.7717/peerj.8405 (PMC7103201; doi:10.7717/peerj.8405)
Supplement: Supplemental Information 1 [file peerj-08-8405-s001.xlsx]

## Sheet: LA sampled
	Ahmadnagar Forest Department (2006-07)
Sampled	Range	2007-2008 records no.	Place of Incident	Dt of Incident	date of interview	species of livestock attacked	number attacked	timeof attack	details of attack	rescued?	did leoaprd feed off prey	carcass thrown or buried	location of attack	number of livestock owned at time of attack	bull	calf	goats	buffalo	number of livestock owned now	bull	calf	goats	buffalo	Livestock protected at time of attack	comments	livestock protected now		comments	is protection adequate now	own dogs then?	comments about dog	own dogs now?	metal collars on dogs?	land owned (acres)	what sown				area under SC	milk sold every day	occupation			annual salary	education'	leopards always present in the area?	since how many years has leopard pop increased	what is main food of leopards
LA 1	Akole (Pra.)	15	Lingdev	2006-05-13	2007-10-15	goat	1	06:00:00	6 am leopard caught goat which was tied outside house and people went nad leopard ran off	yes	yes		outside house		3 bull		4 goats			3 bull		3 goats		no		no			no	yes	leopard taken their dog	no		11.5	bajri	vegetables			0	0	farmer			5000	0	yes	2	dog	peacock
LA 10	Akole (Pra.)	141	Chas	2007-12-14	2007-10-15	goat	1	23:00:00	there was no door in cattle shed, the farmer saw the leopard but could not find the body in the morning	no	yes		outside house	6 cows	2 bull	4 calf	5 goats		3 cow	3 bull	2 calf	4 goats		no	open cattle shed	yes		goats put inside house	yes	no		no		1.5	bajri	wheat	fodder		10 guntha	20	farmer	dairy	service	25000	10	yes	5	dog
LA 10 I	Akole (Pra.)		Chas	2007-03-19	2007-10-15	goat	1
LA 104	Akole	69	Sultanpur	2007-08-19		goat	2	04:00:00	there was no electricity, when the animal came and two goats were killed	no	yes		outside house	1	2	1	10		2	2		8		yes	in a stick house	yes		boma of zyziphus and prosopis	yes, they say it comes regularly but cannot get in	yes	2 dogs taken in last 2 months	yes	yes but still take dogs with collars	1		vegetables	maize		0		farmer	shepherd		10000	4	yes	16	dog
LA 105	Akole		Kalas	2007-10-22	2007-10-31	goat	3	night	the leopard dog a rock under the post of the cattle shed and got inside and killed three. 2 eaten a bit of the backside	no	yes		outside house	2			3		2					yes	a big stone was moved to the side and a gap pf about 1 foot was used to get inside	yes		same situation	no	no	2 years back 2 dogs taken	no		2.5	mulberry				0	10	farmer	dairy		do not know	9	yes		dog	goat
LA 107	Rajur	213	Nimbraj	2006-12-09	2007-10-30	goat	1	23:00:00	the leopard jumped inside the cowshed and kille dhte goat but ran off beucase people came	yes	no		outside house	1		1	3	1			2	1	2	yes	not good protection	yes		fortified the protection	yes	no		no		2					1.5		farmer	dairy		did not say	0	yes
LA 108	Akole (Pra.)	144	Indori Phata	2006-12-12	2007-10-30	goat	1	19:30:00	They saw a leopard on the road because of headlights and they tried to drive it away when another leopard attacked their goat and the attacker ran off because of people. The two leopards then sat in the fields. People made fire and shone torch. They keep for 2/3 days but people were sleeping outside/	yes	no		outside house	1	2	1	2		1	2		3		no		yes		work of a wall still has to be completed	yes	no		no		2.5		vegetables			0	10	farmer	dairy	service	100000	0	no	6	dog	cats
LA 109	Akole	72	Paithan	2007-08-24	2007-11-01	goat	1	19:30:00	taken outside the house	no	yes		outside house	1			1		1		1	2		yes	they keep inside house but that day it got too late	yes		inside house	yes	no		no		2	rice				5 gunta	5	farmer	dairy	labourer	8000	12	yes	4	dog	goat
LA 10a	Akole		Chas	2007-10-07	2007-10-15	goat		19:00:00	it was daylight, 3 were killed, rescued and were buried	yes	no	buried	outside house
LA 11	Akole (Pra.)	19	Chas	2006-05-19	2007-10-15	goat	1	23:00:00	in was in night - they found the neck eaten		yes		outside house	2 cows	2 bulls	1 calf	2 goats		2 cow	2 bull	1 calf	1 goat		no		yes		in proper cattle shed	yes	yes		yes	no	2.5		vegetable	maize		0	0	farmer		labourer	40000	12	yes	15
LA 110	Rajur	152	Paithan	2006-09-23	2007-11-01	goat	1	night	at midnight they heard the sound of the cowshed door fall - it was made of sticks and thorns. The leopard took the goat but people rescued it and leopard also came back next night.	yes	no		outside house	1		1	3		1			4		yes	the leopard got down the flimsy door	no				no		no		2.5	rice				0	now cow is pregnant and not giving milk	farmer	dairy	labourer	5 bags of rice	0	yes		dog	goat
LA 111	Akole	113	Ambhol	2006-10-27	2007-11-01	goat	1	16:00:00	took one goat from the forest area, there were 3 bull, 1 cow and 2 more goats along with this goat and a person too.	no	yes		while grazing	1	3	2	2		1	3	3	1		yes	in cowshed but this happened while grazing, 2 years back 2 calves eaten in cowshed	yes		young inside house	yes	no		no		15	rice	vegetables	tomato		0	8	farmer	dairy		10000	0	yes
LA 112	Rajur	167	Ambhol	2006-12-08	2007-11-01	goat	1	19:00:00	tied outside the house and was taken	no	yes		outside house	3			2		3		2	2		yes	normally ties inside house but that day were late	yes			yes	no		no		do not know	do not know	do not know			do not know	5	farmer	dairy			0	yes
LA 113	Rajur	166	Ambhol	2006-12-08	2007-11-01	goat	1	16:00:00	the goat was gone. 5 Pm he wwent to check and in morning it was found in the forest	no	yes		outside house	3	2		7		5	2		15		yes	evening kept in house	yes		inside house	yes	yes	one dog taken two months back	no	yes	3	rice				0		farmer	dairy		rice and beans, 4000	0	yes	4
LA 114		56	Kotul	2006-07-19	2007-11-01	goat	1		same spot as 166	no	yes			2	2		9	1	2	2		7	1	no	in evening kept in house	yes		inside house	yes	no	3 years back dog was taken	no		4	rice				0	6	farmer	dairy		8000	3	yes	5		calf
LA 114 a	Rajur	171	Kotul	2006-12-18		goat	1
LA 115	Rajur	168	Kotul	2006-12-13	2007-11-01	goat	1	night	goat was taken from cowshed at midnight. Dogs barked and people ran out and chased the leoparf away.	yes	no		outside house	10	2	6	65	5	10	2	6	65	5	yes	in open cowshed	yes		they have closed th window of the goats with sticks	no	yes	8 days before goat attacks, dog was taken by leopard.	yes		20		vegetables			12	40	farmer	dairy	service	50000	10	yes		dog
LA 116	Rajur	9	Kotul	2006-04-17	2007-11-01	goat	1	night	the leopard made an opening in a cowshed made of sticks and went in	yes	no		outside house	1			3		1		1	2		yes	badly made	yes		some more zyziphus branches	not very good	yes	dog was taken but it was rescued	no	no	20 gunta				fodder	0	6	farmer	dairy		8000	0	yes	4	dog	calf
LA 119	Rajur	209	Kotul	2007-01-19	2007-11-01	goat	1	19:30:00	goat was taken from outside house	yes	no		outside house	1			5		1			4		no		yes		inside house	yes	no		no		2		vegetables			0	0	farmer			5000	0	yes	6		calf
LA 119 a	Rajur	165	Kotul	2006-12-05		goat	1
LA 119 b	Rajur	170	Kotul - Bhangewadi	2006-12-16		goat	1
LA 119 c	Akole	74	Kotul	2006-08-30		goat	2
LA 119 d	Akole	114	Kotul	2007-10-27		goat	1
LA 12	Sangamner?		Javlekadlaq	2007-09-06		goat			took goat outside shed	yes	no		outside house			7 calf	6 goat					5 goat		yes	protection not effective	yes		increased the sticks around the shed and put a thrown fence	yes	no		no		2		fodder	pomegranate		0	0	farmer		labourer	20000	0	no leopards earlier	6	dog
LA 120	Akole	87	Kotul	2006-09-12	2007-11-01	goat	1	17:30:00	heard sound in cowshed . The goat was dead but not eaten.	yes	no		outside house	2	2	2	7	1	2	2	2	6		yes	in proper shed, but the leopard came early and took	yes		that day the leopard came before sundown	yes	no	dogs are not kept because of leopards	no		10		vegetables			5	5	farmer	dairy		200000	Mcom	yes	4	dog	calf
LA 122		160	Kotul	2006-11-17	2007-11-01	goat	1	04:00:00	goat was taken from cowshed . Another attack a month ago but goat was rescued	no	yes		outside house				5		1		1	3		no		no		they do not have place even for themselves	no	no	a year back a dog was taken	no	no	1.5		vegtetables			0	5	farmer	dairy		10000	10	yes	3	dog	calf
LA 123	Rajur	215	Dhamangaon pat	2007-03-19	2007-11-02	goat	1	04:30:00	the leopard attacked the goat in a stick cowshed and the goat was rescued but died next day and was buried	yes	no	buried	outside house	3			2		1			1	2	yes	but stick cowshed	yes		in house	yes	no		no		1		vegetables			0	5	farmer	dairy	20000	0		yes	3	dog
LA 124	Akole		Mogras	2007-07-15	2007-11-02	goat	2	02:00:00	leopard came into stick cowshed and ran off	yes	no		outside house	7	3		4		3	3	2	9		yes	in stick cowshed	yes		small animals are inside house after 9 Pm but in same cowshed before that		no		no		2	rice	vegetables			0	4	farmer	dairy	wife works in anganwadi	6000	10	yes	5		goat
LA 125	Akole	107	Pangri	2006-10-11	2007-11-02	calf	1	night	leopard attacked calf and they woke up and it ran off. Calf died after 2 days	yes	no		outside house	1		1	1		1		3	1		no	the goat was kept inside house but the calf was outside	no				no		no		2		vegetables			0	5	farmer	dairy		12000	9	yes	10	dog	goat
LA 126 a	Akole		Pangri	2006-11-23
LA 126 b	Rajur	151	Mogras	2006-07-29		goat	1
LA 126 c		66	Pangri	2006-08-14		calf	1
LA 126 d		46	Pangri	2006-07-31		goat	1
LA 127	Akole	70	Pangri	2006-08-21	2007-11-02	calf	1	11:00:00	it was grazing in front of the house 50 m from sc field. The people got her back but she was dead	yes	no		outside house	3		2			2		1			yes	small ones used to be kept inside house	yes		small are kept inside houe in night	yes	no	12 days back leopard came and took cat which was sitting on a 15 year old childs lap - sitting in the porch of the house	no		6		vegetables	fodder		1	10	farmer	dairy		12000	0	yes	10	dog	goat
LA 128	Akole		Pemgiri	2007-02-12	2007-11-13	goat	1	05:00:00	in the morning th goats were running around scared and then they saw that one was dead	yes	no		outside house	2	2		7		2	2		2		yes	badly constructed cowshed	yes		fortified cowshed	yes	yes	one dog was taken by leopard even though it had a metal collar	yes	yes	2		vegetables	onion		0	8 but now pregnant	farmer	dairy	labourer	5000	0	yes	5	dog	goat
LA 13	Sangamner?		Javlekadlaq	2007-08-06		calf		04:00:00	normally the animals are protected but the shed was dismantled which is why it was tied outside	since it was not taken away they left it out and it was taken later on	yes		outside house	2 cows		1 calf			2 cow					no	tied outside house	yes				no		no														no leopards earlier	15	dog
LA 130	Akole		Dhumalwadi	2007-12-12	2007-12-25	calf	1	03:00:00	the leopard came three times int eh night and so the people say outside till 6 am near the fire.	yes	no	thrown	outside house	1	1	1			1	1				no	tied outside	yes		made cattleshed but not well protected	no	yes		yes		1.5		vegetables			0.5	8	farmer	dairy		do not know	0	no	5	do not know
LA 131	Akole		Pansarwadi	2007-12-06	2007-12-25	goat	1	night	the goat was tied very ner the corner fo the cowshed and the leoaprd managed to get its head inside and kill the goat but because the goat was tied and cowshed was pretty good, he could not take it out and there was lots of blood of the wood, floor etc. the goat died.	yes	no	thrown	outside house	1		1	6		1		1	5		yes	but one small hole and goat was tied too close to that hole	yes			yes	no	3 dogs taken this year and one had collar	no	no	0.5	onion				0	0	farmer		labourer	10000	0	no	10	dog	goat
LA 132	Akole		Pansarwadi	2007-11-30	2007-12-25	goat	1	16:00:00	4 goats were taken grazing, the man saw the leopard but leopard took goat away. Man was alone and so did not do antyhing.	no	yes		while grazing				3					5		yes		yes		but happened while grazing	yes	no	one dog was taken 15 days before invident	no		0.5	wheat				0	0	farmer		labourer	10000	0	yes	12	dog	goat
LA 133	Akole		Shekewadi	2007-12-23	2007-12-25	goat	1	03:30:00	the leopard pulled the goat and the stake also came loose and then the door opened and the goat was dragged with	no	yes		outside house	1		1	3		1		1	2		yes	the leopard pulled the stake which opened the door of the cowshed	yes		there is still a gap	no		in 2 years three dogs taken, one dog was tied with chain and was taken with the chain	yes	yes but taken with collar	1		vegetables	wheat		0.5		farmer	dairy		do not know	0	yes	always	dog	goat
LA 14	Sangamner?		Javlekadlaq	2007-06-21		calf		21:30:00	cow shouted and the calf was dragged	yes	no		open cowshed	3 cows		1 calf			3 cow					no						yes	died the day before calf attack	no	no	11		vegetables			2	12	farmer	dairy	service	200000	graduation	no leopards earlier	5
LA 15	Sangamner?		Javlekadlaq	2007-06-21		goat		23:30:00	goat was tied to the tree and was attacked. The same night killed a dog at 12 AM but dog was rescued. Then at Nimgaon Bhojapur 2 km away a calf was killed in the morning and it was eaten	yes	no		outside house	1 cow			1 goat		1 cow					no		yes		now kept in shed surrounded by plastic but next to bed where people sleep		yes		yes	no	6		vegetables			3	3.5	farmer	dairy		in debt now	10	no leopards earlier	7	dog
LA 16	Sangamner?		Javlekadlaq	around 5 jul 07		goat	carcass not found there fore compensation not got	03:00:00	goat was in cattleshed that was not very well protected	no	yes		outside house	5 cow		2 calf	2 goats		5 cow			4 goats		yes	but shed had many opening	yes		more thorn sticks around now			one dog taken by leopard	yes	no	10		vegetables	grapes		2	10	farmer	dairy		6000	0	no leopards earlier	5
LA 17	Sangamner?		Ashvi
LA 18	Sangamner?		Dongargaon	2007-08-28	2007-09-05	goat		18:30:00	goat was tied outside		yes	taken away	outside house	1 cow		1 calf	3 goats		1 cow			2 goats		yes	but it was before animal was taken inside house	yes		kept inside house in the night	yes	yes	one dog taken 3 years back by leopard	yes	no	2		vegetables	fodder		1	10	farmer	dairy		do not know	0	yes		dog
LA 19	Sangamner?	178	Dongargaon	2007-01-01	2007-09-05	goat	2	01:30:00	goat was taken in the night, two died, one injured but died later	yes	no		outside house				20 goats					13 goats		yes	the goat shed was not effective, made of grass and sticks	yes		ineffective shed	no	yes		yes	no	1	bajri	vegetables			0	7	farmer	dairy		do not know	0	no	2
LA 2	Akole		Kalas BK	14 sep 07 - 14 oct 07	2007-10-14	goat		21:00:00	leopard took it, was rescued but died in an hour. Did not apply for compensation because money got would not have been enough	yes	no		outside house	10 cows		1 calf	1 goat		10 cows		1 calf			no		no		they tie the small ones between the big	no		leopard taken their dog a year ago	yes	now yes	7.5	fodder	vegetables			1.75	35	farmer	dairy		18000	10	yes	1	dog
LA 20	Sangamner?	21	Dongargaon	2006-04-25	2007-09-05	goat	1	00:00:00	they heard the cows making a ruckus and the leopard had got inside the cattle shed	yes	no		outside house	2 cows	2 bull	1 calf	4 goats		2 cows	2 bulls		3 goats		yes	open cattleshed, and one month after attack, another kid was taken but did not apply for compensation because too much time and money, taken at 3 AM, and no door to shed	no		no door where animals kept	no					6		vegetables			5	2	farmer	dairy		7000	7	since 3 years		dog
LA 21	Sangamner?		Dongargaon	2007-03-25	2007-09-05	goat				yes	no			1 cow			3 goats					1 goat		no		yes				no		no		5	bajri	vegetables			1.5	3	farmer	dairy		6000	0	since 3 years	1	dog
LA 22	Sangamner?		Gunjalwadi	2007-02-23	2007-09-06	calf		00:00:00	heard dog bark	yes	no		outside house	8 cow		4 calf	2 goats	1 buffalo	8 cows		2 calf		1 buffalo	no	tied outside	no		they tie on the inside side of the cow and sleep in the same room	no		they have 8 dogs now and have had 8 dogs taken by leopards before	yes	yes	7	bajri	vegetables	wheat		4	30	farmer	dairy		100000	11	since 7 years	2	dog
LA 23	Sangamner?		Rajapur	2007-06-05	2007-09-06	goat	4	00:00:00	four were killed and one was eaten,	no	yes		outside house	6 cow			7 goats		6 cows			2 goats		no	no door to cattleshed	not yet good, bars of window too far from each other			no	yes		yes	no	2		vegetables	fodder		0.25	30	farmer	dairy		9000	9	no	2
LA 25	Sangamner?		Rajapur	2007-04-13	2007-09-06	goat	1	20:00:00	they used to be taken inside only after 9 PM	yes	no		outside house	3 cow			3 goat					2 goat		no		no		he is in debt and therefore has a lot of problem with money	no	yes	2 dogs taken last year	yes	no	12			fodder	maize	1	6	farmer	dairy		30000	8	no	10
LA 26	Sangamner?		Rajapur	2007-04-12	2007-09-06	goat		19:00:00	tied outside, goat cried and they saw leopard dragging	yes	no		outside house	4 cows		1	1		3		1			no		no				yes		yes	no	0.75		vegetables			0.5	0	farmer	dairy	service	do nto know	3	no	4
LA 27	Sangamner?		Rajapur	2007-04-12	2007-09-06	goat	1	23:30:00	was tied outside and did not get comp because no body. Dog barked and they came to know, but put body back where it was so that leopard would not attack other goats.	no	yes		outside house	5 cows	2		1	2	5 cows	2			2	no		no				yes	one dog taken before 2000	yes	no	12	bajri	vegetables			3	11	farmer	dairy		25000	8	no	15	dog
LA 28	Sangamner?		Rajapur	2007-04-09	2007-09-06	goat	2	19:30:00	it was tied outside as they take their livestock inside at 9.30 when they sleep	yes	no		outside house				16					7		no		yes		take them inside house early now	yes	no		no		1		vegetables			0.5	0	farmer	dairy	husbandry	20000	7	no	1.5
LA 29	Sangamner?		Rajapur	2007-06-15	2007-09-06	goat	1	00:00:00	it was not protected and tied in open	no	yes		outside house	2			1		2					no		no			no	no	had one 2 years back but leopard had taken away	no		20		vegetables			0.25	10	farmer	dairy		7000	6	yes	4	dog
LA 3	Akole (Pra.)	142	Lingdev	2006-12-15	2007-10-15	goat	1	00:00:00	midnight 2 goats were attacked, one was eaten and the other got loose.	did not know it had happened	yes		outside house	6 cows		2 calves	4 goats		6 cows	2 bulls	1 calf	1 goat		no		yes		inside house	yes	no	dog taken a month after the goat incident, neighbour saw it.	yes	no	15	bajri	vegetables			4	25	farmer	dairy		50000	10	since 1974	17		peacock
LA 30	Sangamner?		Javlekadlaq	2007-06-04	2007-09-06	goat	1	20:00:00	it was tied in the cattleshed and the boy saw the leopard frm the window	no	yes		outside house	1		1	4		1		1	3		yes	not effective cattle shed	yes		inside house	yes	no	2/4 dogs of theirs have been eaten by leopards	no		10		vegetables			2	15	farmer	dairy	service (elder son)	20000	0	no	2
LA 31	Sangamner?		Javlekadlaq	2007-06-01	2007-09-06	calf	1	night	morning they found it eaten on the road	no	yes		outisde house	4	2	1			4		1			no		no				yes		no	no	3		vegetables		maize	0.5	3	farmer	dairy		50000	10	no	2	dog
LA 32	Sangamner?		Javlekadlaq	2007-06-01	2007-09-06	goat	1	night	they went out in night and found blood trail	no	yes		outside house	3			3		3			2		yes	open cowshed	yes		in cowshed which has sticks and bamboo wall	no	yes	dog killed 15 days before incident in the night and its stomach was broken and eaten (maybe because it had collar?)	no	yes	2		vegetables	fruit		0	5	farmer	dairy		80000	9	no	3	dog
LA 33	Sangamner?		Javlekadlaq	2008-07-11	2007-09-06	goat	2	night	saw it in the morning	no	yes		outside house	1	2		2		1	1				yes	in rough cattle shed	no			no	yes	but missing since2/3 months	no	no	2		vegetables	fruit	maize	0	0	farmer	dairy		20000	Post graduation	no	1
LA 34	Sangamner?		Javlekadlaq	2008-07-16		goat	1	night		yes	no		outside house	1			1		1		1			no		no		informed them that protection not adequate	no	no		no		1.75	bajri				0	12	farmer	dairy		5000	7	no	8
LA 35	Akole	112	Ambad	2006-10-16	2007-09-27	goat	1	19:00:00	caught it outside house and dragged it 50 m	yes	no		outside house	1	1	1	1		1	1				yes	but they delayed getting it inside	yes				no		no		1.5		vegetables			0	0	farmer			7000	8	yes	not increase
LA 36	Akole (Pra.)	133	Aurangapur / Akole	2006-11-13	2007-09-27	goat	1	night	tied in shed	no	yes		outside house		2		1		1	2	1	1		no		yes		inside house	yes	no		no		1		vegetables	fodder		0.25	0	farmer			10000	12	maybe	not increase	dog
LA 36 I	Akole		Aurangpur	Dec 07	2007-09-27	goat	1	20:30:00	tied outside house because they were having dinner and were going to put it inside after dinner	yes	no		outside house
LA 37	Akole		Dhamangaon	~27 Aug 07	2007-09-27	calf	1	night	calf missing frm cowshed 200 from house, did not find the body	no	yes		outside house	1	2	2			1	2	1	7		no	they keep the cattle in a shed about 200 m from house so that it is easier to let them loose for grazing	yes		keep goats at home	yes			yes	yes	4.5	bajri	onion			0.25	0	farmer			25000	6	yes	6		sheep
LA 38	Akole (Pra.)	176	Dhamangaon Awari	2006-12-30	2007-09-27	calf	1	00:30:00	the leopard attacked the calf in an open shed and the leopard did not retreat on seeing the person. The man got scared, went home and came back and leoaprd was feeding on the calf	no	yes		outside house	2	2	1			1	1	1			no	open shed	no		no space in house to keep them	no		dog was taken by leopard	no		20	bajri	vegetables	onion	tomato	1.5	0	farmer			20000	7	yes	4		sheep
LA 38	Akole	44	Dhumalwadi	2006-07-07	2007-09-27	goat	1	20:30:00	goat was tied outside and they heard noise and saw the pugmarks	yes	no		outside house	2		1	2		2		2	1		yes	they were late in taking the animal inside	yes			yes	yes	dog was taken the same night	yes	no	3		vegetables	fodder		0.5	8	farmer	dairy		12000	7	25	17	dogs
LA 4	Akole (Pra.)	192	Lingdev	2007-02-01	2007-10-15	goat		23:00:00	leopard broke into cowshed made of sticks and thorns.	yes	no		outside house				4 goats				1 calf	4 goat		yes	not a good cowshed	yes		in proper cowshed	no	no				3.75	bajri				0		farmer	labourer		2000	7	15 years		dogs
LA 40	Akole (Pra.)	150	Dhumalwadi	2006-12-19		goat	2	18:00:00	people realised that it had come and leopard ran off	yes	no		outside house		2		6			2				yes		not applicable			no					does not know	does not know	does not know	does not know	does not know	does not know	does not know	does not know	does not know	does not know	does not know	does not know	yes	3		hare
LA 40 I	Akole	80	Dhumalwadi	2006-09-08		goat	1
LA 40 II	Akole (Pra.)	14	Dhumalwadi	2006-05-19	2006-05-10	goat	1
LA 41	Akole	86	Dhamangaon Awari	2006-09-20		goat	1	21:00:00	they were sleeping when they heard a noise and went out and found the goat dead. They got it inside the house.	yes	no		outside house	2	3		2		2	3	1	1		no		yes		inside cowshed	yes	no		no		do not know	do not know	do not know	do not know	do not know	do not know	do not know				do not know	do not know	no	4	dog
LA 42	Akole (Pra.)	5	Dhamangaon Awari	2006-04-04	2007-10-16	goat	1	18:00:00	goat called and they came out and rescued her. She was alive for a day	yes	no		outside house	2	2	2	2		1	2	2	1		no		yes								do not know	do not know	do not know	do not know	do not know	do not know	do not know	do not know	do not know	do not know	do not know	do not know	yes	not increase
LA 43	Akole	83	Dhamangaon / Akole	2006-09-12	2007-10-16	goat	1	21:30:00	there was bajri crop at the side and the goat was tied outside. People on the road saw the leopard and the leoaprd ran off	yes	no		outside house	2			5							would take them inside house				do not want to keep livestock		no		no		3	bare land				1	0	farmer	has a shop		10000	5	yes	12	dog
LA 44	Akole	116	Dhamangaon Awari	2006-10-20	2007-10-16	goat	1	10:00:00	2 cows, 4 goats, were grazing at the field and a boy came running	no	yes		at field where aniaml was grazing	2	2	2	4		2	2	2	3		yes	happened in the morning	yes			yes	yes	2 months ago a dog had been taken	yes	yes	do not know	do not know	do not know	do not know	do not know	do not know	do not know	farmer			do not know	2	yes	20
LA 45	Akole (Pra.)	11	Dhamangaon Awari	2006-04-19	2007-10-16	goat	1	20:00:00	cow shouted and the goat was killed	yes	no		outdie house	1		1	3		1		1			yes	not well	yes		better walls after attack	not as good as should be	no		no		4		vegetables	onion		1	5	farmer	dairy	own shop	cannot say	8		4	dogs
LA 46	Akole	90	Dhumalwadi	2006-10-21	2007-10-16	goat	1	18:30:00	the goat yelled and the people ran shouting and leopard ran off. A month ago a calf was attacked and was treated spending 1500	yes	no		outside house	1	2	1	2		1	2		3		yes	but tied later on in the evening, the attack happened quite soon	yes		take calves and goats inside house	yes	no		no		3	bajri		wheat		0	0	farmer			15000	12	yes	5
LA 47	Akole (Pra.)	120	Dhamangaon Akole	2006-10-18	2007-10-16	calf	1	22:00:00	the calf shouted and they came out and the leopard ran off and the calf was alive for the night	yes	no		outside house	4		1			4		1	1		no		yes		kept inside	yes	yes		no	yes	3		vegetables			2	10	farmer	dairy		8000	10	yes	5
LA 48	Akole (Pra.)	137	Dhumalwadi	2006-11-26	2007-09-27	goat	1	17:00:00	a km from the house, in sc/maize area they were coming back home with 6 goats when leopard took it.	no	yes		in field				6					0								no		no		3		vegetables			1		farmer			cannot say	0	yes	10 years
LA 49	Akole (Pra.)	200	Malijhap	2007-03-16	2007-09-27	goat	1	19:30:00	goat taken from outside house	no	yes		outside house	1			4		1			2		yes	but used to take them inside at 8.30 pm but attck happened at 7.30 PM	yes		now they take the animals inside at 7 PM	yes	no		no		do not know	do not know	do not know	do not know	do not know	do not know							yes
LA 5	Akole	81	Chas	2006-09-05	2007-10-15	goat		9.30 AM	he was taking 7 goats grazing when leopard came down from hill, picked goat and took it away.	no	yes		hill where it was grazing	2 cows	2 bull	2 calves	7 goats		2 cows	2 bulls	2 calf	5 goats		out in open with gotherd	with goatherd	at home yes		sinc e18 years goats in shed in night	yes		in 3 years 3 dogs taken by leopards	no		15	dry crops				0	3	farmer		dairy	50000	6	yes	5	dogs	peacock
LA 50	Akole	34	Virgaon	2006-06-12	2007-10-18	goat	1	02:30:00	dog barked and they shone the torch and saw the leopard. It left the carcass and did not eat but ate nearby farmers goat	yes	no		outside house	1		1	2		2	2	1	3		no	someone was sleeping in the same shed	yes			yes	yes		yes	no	2	bajri	onion			0	0	farmer	labourer		25000	0	yes		dogs
LA 51	Akole (rohyo)	212	Virgaon	2007-02-10	2007-10-18	goat	1	night	goat was sitting with head outside and leopard caught it and took it but did not eat the goat, but also took a goat kid which they could not find and therefore did not do compensation	yes	no		outside house	1		1	2	1	1	2		1	1	yes	in a stick cowshed	yes		but in same cowshed because they do nto have an option	no	yes		yes	yes	6	bajri	onion			1	0	farmer			50000	0	no	25	not answered
LA 52	Akole	185	Virgaon	2007-01-19	2007-10-17	calf	1	12:00:00	at midnight mother and calf were tied outside the house when they woke up in morning they found the dead body	no	yes		outside house	1		1					1			do not know		yes		keep inside house	yes	no	in one year 5/6 dogs taken by leopard, taken from doorstep	yes		3		vegetables			1		farmer			5000	0	no	4	dog
LA 53	Akole (rohyo)	129	Ganore / Akole	2006-11-09	2007-10-18	goat	1	19:30:00	it was raining and it was dark,the dogs ran and lady went out and leopard ran off with goat	yes	no		outside house	3	2	1	25		3	2	2	2		yes	boma with thorns around	yes		but same and leoaprd can still come	no	yes		yes	yes	6			fodder		0	20	dairy			40000	4	yes	do not know	dogs
LA 54	Akole (rohyo)	122	Ganore	2006-10-19	2007-10-18	goat	3	night	in the night, 2 goat kids and one goat were attacked, the two kids were taken away and comp done only for the goat because it was at the site.	no	yes		outside house				4		3			3		yes	not there anymore	no		because they are building a new hosue and sleep outside with livestock		no		yes	no	do not know	do not know	do not know	do not know	do not know	do not know	do not know	do not know	do not know	do not know	do not know	do not know	no	3
LA 55	Akole	20	Ganore	2006-04-24	2007-10-18	goat	1	night	it was tied in te cowshed when they heard sound of other aniamls. The leopard left the goat and ran off, the goat was dying	yes	no		outside house	1	2		1	1	1	2			1	yes		yes		not effective, open in many places	no	no	dog taken a year before incident	no	no	7		vegetables	fodder		3	12	farmer	dairy		do not know	11	no	5	dog	calf
LA 56	Akole (rohyo)	92	Virgaon	2006-09-07	2007-10-18	calf	1	night	the calf was dragged about 10 m and in the morning they saw it	no	yes		outside house	1		1			2	2	1	1		yes	in bad cowshed	yes		still bad	no	no		no		2					2	12	farmer	dairy		10000	10	yes		dog
LA 57	Akole (Pra.)	12	Ganore	2006-04-19	2007-10-18	goat	1	19:30:00	it was tied outside house the were waiting to put the animals inside after dinner	no	yes		outside house	2		1	2		2		1	1		yes	they were late in taking it inside	yes			yes	no		no		2			fodder		1	12	farmer	dairy		24000	MA	yes	3	dog
LA 58	Akole	33	Pimpalgaon Nipani	2006-06-04	2007-10-18	goat	1	night	in the night, one goat was killed and the part of the cowshed wall fell so people woke up and went and leopard ran off. They went back to sleep and it came again after an hour and killed another. They got the second goat body inside but in the night it came an ate 1/2 of first goat. They buried it after panchnama	yes	yes	buried	outside house	2	2		3		2	2	1			no		yes		the young calves are put inside house in night	yes	no	In 2 years 2 dogs were taken - saw pugmarks of leopard when they lost their dogs	no		5	bajri	vegetables	onion	fodder	0	6	farmer	dairy		14000	12	yes	4	dog
LA 59	Akole	36	Pimpalgaon Nipani	2006-06-12	2007-10-18	goat	4	night	in the monign the saw them dead and one was taken away	no	yes		outside house	8	2	4	4		6	2	4	11		no		yes		the shed is 90% good, there is a bit athte top which is open and through which a leopard can get through	no	yes		yes	no	3		vegetables	onion	fodder	0	70	farmer	dairy		50000	10	no	5	dogs
LA 6	Akole (Pra.)	196	Chas	2007-02-09	2007-10-15	goat	1	15:00:00	handful of goats were free raning and leopard got it. At 5 pm the panchnama was done and he was told to leave the carcass back at attack site	yes but left behind	yes		near fields	1 cow			6 goats		1 cow			5 goats		taken while grazing	livestock protected at home in evening	yes	grazing is now inside house	night time kept in house	yes	no		no		9	bajri	harbara		vegetables	9	0.5	farmer	labourer		4000	0	yes	3 years	dogs
LA 6 I	Akole (Pra.)	184	Lingdev	2007-01-18	2007-10-15	goat	1			yes	no
LA 6 II	Akole (Pra.)	181	Lingdev	2007-01-06	2007-10-15	goat	1				yes
LA 6 III	Akole	60	Lingdev	2006-08-09	2007-10-15	goat	1			yes	no
LA 60	Akole (Pra.)	183	Takli	2007-01-12		goat	1	19:00:00	the goat was tied outside and people were also sitting outside. They ran after leopard an leopard ran off	yes	no		outside house	3			4		3			4								no	they killed a dog of theirs beucase he was biting	no		3		fodder	maize	onion	2		farmer	dairy		35000	0	20	12	dogs	calf
LA 61	Akole		Dhumalwadi	2007-08-07		goat	2	night	one goat was killed but leopard could not take it away because f the rope tied around its neck and so another was killed and taken away. Only in the morning did they come to know.	no	yes	buried	outside house	not asked	not asked	not asked	not asked	not asked	not asked	not asked	not asked	not asked	not asked	no																	farmer	dairy		40000	6		5
LA 62	Akole	26	Kalas	2006-05-21	2007-08-20	calf	1			yes			outside house	not asked	not asked	not asked	not asked	not asked	not asked	not asked	not asked	not asked	not asked	no																	farmer	dairy		5000	12	20	2	dogs	calf
LA 63	Akole	57	Kalas BK	2006-08-02	2007-08-20	cow	1			yes				not asked	not asked	not asked	not asked	not asked	not asked	not asked	not asked	not asked	not asked	no																	farmer	dairy		22000	10	yes
LA 64	Akole	73	Kalas	2006-08-28		sheep	2		eaten the backside	no	yes		outside house	not asked	not asked	not asked	not asked	not asked	not asked	not asked	not asked	not asked	not asked	no																	farmer	dairy		15000	MA	20	12 years	dogs	sheep
LA 65	Akole (Pra.)	148	Kalas BK	2006-12-10		goat	4	night	the cattle were in a shed that had leaf walls and lead roof. The leopard came from the wall.	yes			outside house	not asked	not asked	not asked	not asked	not asked	not asked	not asked	not asked	not asked	not asked																		farmer	dairy		10000	7	5		dogs	livestock
LA 66	Akole (rohyo)	131	Sawargaon pat	2006-11-13		goat	1	10:30:00			yes		grazing	not asked	not asked	not asked	not asked	not asked	not asked	not asked	not asked	not asked	not asked	no	grazing and people were nearby									0							labourer			20000	9	15		dogs	sheep
LA 67	Akole (rohyo)	211	Sawargaon pat	2007-02-09		goat	1	05:00:00			no		outside house	not asked	not asked	not asked	not asked	not asked	not asked	not asked	not asked	not asked	not asked	no							they have lost all their dogs to leoaprds			5	bajri	vegetables	tomato			12	farmer	dairy		18000		always
LA 68	Akole (rohyo)	169	Sawargaon pat	2006-12-14		goat	1	04:00:00	taken away and eaten	no	yes		outside house		not asked	not asked	not asked	not asked	not asked	not asked	not asked	not asked	not asked
LA 69	Akole (rohyo)	134	Shamsherpur	2006-11-14		goat	1
LA 7	Akole (Pra.)	123	Chas	2006-10-26	2007-10-15	goat	1	9.30 PM	they shouted when attack happened and leopard left the goat and ran off	yes	no	buried	outside house	5 cows	2 bull		19 goats		1 cow	2 bull	3 calves	12 goats		no		yes			yes	no	in five years leopard has taken 3 dogs	no		2.5	bajri	lemon	wheat		0	0	farmer	labourer		10000	8	yes	5 years		peacock
LA 7 I	Akole			2007-09-23	2007-10-15	goat		15:00:00	20 goats were out grazing when one was killed		yes		while grazing	6 cows	2 bulls	3 calf	30 goats		5 cows	2 bull	3 calves	6 goats		taken while grazing	livestock protected at home in evening	yes			yes	no	last year a dog taken from outside house	no	no	5		lemon		vegetable	0	20	farmer	drive self owned vehicle	dairy	50000	0	yes	10 years	dogs
LA 70	Akole (Pra.)	4	Shamsherpur	2006-04-02		goat	1
LA 71	Akole	28	Shamsherpur	2006-05-22		goat	1
LA 72	Akole (rohyo)	193	Sawargaon pat	2007-02-04		goat	1
LA 74	Akole	89	Shekewadi	2006-11-01		calf	1
LA 75	Akole (Pra.)	127	Shekewadi	2006-11-08		calf	1
LA 77	Akole (Pra.)	172	Pansarwadi	2006-12-25		sheep	1
LA 78	Akole (Pra.)	145	Parkathpur	2006-12-04		goat	2
LA 79	Akole (Pra.)	173	Sugaon BK	2006-12-28		goat	3
LA 8	Akole	99	Chas	2006-09-25	2007-10-15	goat	2	15:00:00	it was raining, there were 5/6 people and 25 goats. Two goats were taken and eaten	no	yes		while grazing	1 cow			4 goats		1 cow			3 goats		taken while grazing	livestock protected at home in evening	yes			yes	yes	in four years 5 dogs, taken 2 dogs with metal collars	yes	no	1.5	bajri				0	0	farmer	labourer		2500	6		1994
LA 80	Akole (Pra.)	175	Sugaon BK	2006-12-29		goat	1
LA 81	Akole		Manoharpur	2007-07-09		Calf	1				Yes	Taken away	outside house
LA 83	Akole (Pra.)		Takli	2007-04-09		goat	1	15:00:00	25 goats were being grazed in the field and leoaprd took the goat into sc	no	yes		while grazing				26					25		yes		yes						yes		1.5					1	20	farmer	dairy		5000	6		3	dogs
LA 84	Akole (Pra.)	13	Takli	2006-04-30		calf	1		the calf was attacked and died after a month	yes	no	thrown	outside house						1	2	1										3 dogs have been taken by leopards so far			2	bajri				0	2	farmer	dairy		5000	0	no		dogs
LA 85	Akole (Pra.)	17	Gardani	2006-05-14		goat	1	night			no	buried	outside house	1	1	1	2													no		no		1	bajri				0		farmer			did not say	did not say	yes
LA 87	Akole (Pra.)	197	Rede	2007-02-14		goat	2	20:00:00			yes		outside house	5			2		5			1		yes	late to tie the animals that night	yes				no	dog taken from house	no		3.5	tomato	corn	wheat		1					15000	6	10		dog	calf
LA 88	Akole	189	Kumbhefal	2007-01-05		goat	1
LA 89	Akole (Pra.)	7	Kumbhefal	2006-04-14		goat	1	19:30:00	it was tied outside and died after one day	yes	no		outside house	2			1		2			2		no		yes				no	dog taken two years back	no		5	bajri				0.5		farmer	dairy		20000	BA	yes	3
LA 9	Akole	97	Chas	2007-09-23		goat	1	15:00:00	20 goats were taken for grazing and one was killed and half eaten	no	yes		while grazing	6	2	3	30		5	2	3	6		yes		yes			yes	no	last year dog was taken from outside house	no		5		lemon	vegetables		0	20	farmer	dairy	driver - self owned vehicle	50000	0	yes	10	dog	cat
LA 90	Akole	54	Chas	2006-07-24		calf	1	23:00:00	in the morning they found ti dead and eaten	no	yes		outside house	2		1			1	2	1			no	summer it was hot so they would tie them outside	yes		inside house	yes	no	last yer a dog was taken before their eyes	no		0.5			vegetables		0	0	farmer		labourer	5000	0	yes	3
LA 90a	Akole		Kumbephal	Oct 06	2007-10-30	goat	2	19:00:00	it was tied in front of the house about 50 m away. There were 2 goats f which one was taken and body was nto found. The other was killed		yes		outside house	2	2		8		2		1	3		no	in front of house	no		tied outside	no	no	dogs taken by leopards	no		4	tomato	onion			1.5	3	farmer	dairy		25000	10	yes		dog	goat
LA 91	Akole (Pra.)	195	Kumbhefal	2007-01-17	2007-10-30	goat	1	20:30:00	the goat was attacked outside the house and they saw the leopard take it. They rescued the goat but it died. Only one goat was tied.	yes	no		outside house				1					3		yes	but would take it inside house at 9.30 PM	yes		take it inside early	yes	no		no		1.5					1.5	0	farmer	labourer		10000	10	no	5	dogs	goat
LA 92	Akole		Kumbephal	2007-10-25	2007-10-30	goat	1	02:00:00	the goat was tied in shed, at 2 am they woke up and the leoaprd ran off. She died the next day.	yes	no		outside house	3			2		3			3		no		yes		not very good, have used wire mesh	no			yes	no	3	maize	fodder			2	15	farmer	dairy		22000	11	no	10	dog	goat
LA 93	Akole (Pra.)	182	Kumbhefal	2007-01-09		calf	1	night	the leopard took it but calf died after 2 days	yes	no		outside house	4	2	3			4	2	2			no	they sleep outside near the calves	no		they sleep outside near the calves	no	no		no		3.5				fodder	2	5	farmer	dairy		10000	0	no	10	dog	calf
LA 93 I	Rajur		Mhaldevi	2006-08-10
LA 94	Akole	79	Kumbhefal	2006-09-07		calf	1	night	found body in the morning in the weeds about 200 m away, the head and legs were remaining	no	yes		outside house	3	2		2		3	2		5								yes		yes	no	1.5			onion	fodder	20 gunta		farmer	dairy		21000	MA	yes	always
LA 95	Akole (Pra.)	203	Kumbhefal	2007-03-01	2007-10-30	goat	1	19:30:00	tied outside in open kitchen. Usually inside house but there was still light. Next day found elgs and head	no	yes		outside house	3			2		2		1			yes	it was till light when leoaprd attacked	yes			yes	yes		yes	yes	1			fodder		10 gunta	20	farmer	dairy		20000	5	yes	always		goat
[truncated: 13 more columns]

## Sheet: dhangar
																																				reasons why compensation not filed for against leopard attacks									reasons why compensation not filed for against wolf attacks
Code	Date	Place	Village of origin	Tal	since when come to this valley this year (this dry season)	till when going to be in this valley this dry season	years coming to this valley	sheep	goats	no. of sheep plus goat that died in this season	since when	of which how many died due to leopard attacks	how many died due to wolves	fate of carcass	comment	reason	horses	cows	bulls	other	dog	no. dogs taken by leopards	poultry	sheep and goats die more in rains back at their village	sheep and goat die more here in the valley in the dry season	sheep and goat die in same numbers in both places	how many groups of dhangars from their village	are dogs helpful in protection	do leopards take your dogs	are dogs useful in protecting against wolves	do wolves take the dogs	any particular breed of dogs	are dogs trained by humans	applied for compensation for leopard attacks?	fate of carcass	do not know about comp/about procedure	illiterate	too much work to get it done	do nto have time]	comp not enough	do not get enough money	how many years since leopards in this valley	applied for compensation for wolf attacks?	fate	do not know	illiterate	too much work to get it done	no time on hands	do not get enough money
Dh1	2008-04-22	Takli	Savargaon Ghule (near Ghargaon)		2008-02-08	Till rains	10	125	75	17	2008-02-08	0		thrown			0	1	3		2		x	y				y		y		n	n	n					y	y		10	n
Dh2	2008-04-22	Bhairwadi	Vankunte Palashi	Parner	2008-01-08	Till rains	6	60	10	22	Diwali 07	6		thrown			0	0	0		0		x	non commital	non commital	non commital	500	y	y	y	n	n	n	n	y			y				6	n	y			y
Dh3	2008-04-22	Takli	Vankunte	Parner	2008-02-08	Till rains	6	375	25	100	Diwali 07	4 - 6	4 - 6 due to wolves	thrown			4	1	2		2		x	y				y	y	y	n	n	n	n		y						6	n
Dh4	2008-04-22	Bhairwadi	Vankunte Palashi	Parner	Diwali 07	Till rains	first time	200	20	40	Diwali 07	3		thrown			2	1			2		x	y			20	y	y	y	n	n	n	n		y		y				1	n		y
Dh5	2008-04-22	Bhairwadi	Vankunte	Parner	2008-01-08	Till rains	6	190	10	16	2008-01-08	4		thrown			3				1	1	x		y		50	y	y	y	n	n	n	cannot say
Dh6	2008-04-22	Kalas	Savargaon	Sangamner	2008-02-08	Till rains	10	55	8	9	Diwali 07	2		buried to avoid contamination	15 days back one dog killed by leopard		0	1	2		2	1	x	y, 10/20 die in 3/4 months			10 - 15 in each village of Akole Tal	y	y	y	n	n	n	n
Dh7	2008-04-22	Kalas	Pemgiri	Sangamner	2008-04-08	till rains	first time	40	9	4	Diwali 07	0		bury it			0	0	0		1		x	y, not enough food			5/6 from pemgiri	y	y	no wolves at their village only leopards			pups learn from other adult dogs	n
Dh8	2008-04-22	Kalas	Pimpalgaon Matha	Sangamner	2008-04-08	Till rains	first time	18	26	5	Diwali 07	0	0	bury it			0	0	0		1		x	y			9	y	y	y	n	n	n	no loss due to leopards									no loss due to wolves
Dh9	2008-04-22		Vankunte	Parner	2008-01-08	till rains	5	50	10	3	Diwali 07	3		eaten by leopards			3	0	0		2	taken by leopards but rescued		y			9/10	y	y	y	n	n	n	yes								5	no loss due to wolves		y
Dh10	2008-04-22	Virgaon	Vankunte Palashi	Parner	2008-01-08	till rains	11	150	10	60	Diwali 07	15		thrown			2	0	0		2		0	not in rains			10/15	y	y	y	n	n	n						y			always	n		y	y		y
Dh11	2008-04-22	Ganore	Sakor Mandwa		2008-03-08	Till rains	14	200	200 inclduing goats	25	Diwali 07	0		thrown or buried depending on time at hand			3	6								non commital	20	y	y	y	n	n	n	n					y			always	n		y	y	y
Dh12	2008-04-23		Jejuri	Pune	2008-01-08	till rains	3	100		not used this interview have not written how many died due to leoaprd																		y	y	y	n	n	n
Dh13	2008-04-23		Kaute Kamleshwar	Sangamner	2008-04-08	till rains	4	100	30	15	Diwali 07	4		thrown			2	3			2			y, due to illness			25	y	y	y	n	n	n	yes, first time they applied		y						always	n		y
Dh14	2008-04-23		Patas	Daund	2008-03-08	till rains	first time	100	10	20	Diwali 07	3, wounded by leopard			first time they saw leopard, they used to be in Daund Tal before where no leopards present											non commital	15	y	y	y	n	n	n	n		y						not applicable	no loss due to wolves, other people have got
Dh15	2008-04-23	Ganore/Virgaon	Pandara	Baramati	2008-01-08	till rains	5	125	5	9	Diwali 07	1		did not ask							1			y, because of disease			30	y	y	y	n	n	n	n, they do not get for wolves so thought they wll not get for leoaprd attacks		y						always	n
Dh16	2008-04-23	Ganore/Virgaon	Pandara	Baramati	2008-01-08	till rains	5	140	10	22	Diwali 07	2		did not ask							1	big dog which was taken by leopard 20 days back		y			30	y	y	y	n	n	n	n		y						always	n		y
Dh17	2008-04-23	Ganore/Virgaon	Jambulwadi	Sakor	2008-01-08	going to stay put in Akole this year	20	125	25	70	Diwali 07	5		thrown			1	2	2	1 buffalo	3						10	y	y	y	n	n	n	n				y				10	n, before 10 years they had problem with wolves in this valley but dogs protect well		y
Dh18	2008-04-23	Ganore/Virgaon	Bhandgaon	Daund	2008-03-08	Till rains	5	112	12	8	Diwali 07	0		na							1			y			2	y	y	y	n	n	n	n		y	y					5	n		y
Dh19	2008-04-23	Ganore/Virgaon	Bhandgaon	Daund	2008-03-08	Till rains	5	140	10	15	Diwali 07	0		na							2			y			2	y	y	y	n	n	n	n		y	y					5	n		y
Dh20	2008-04-23	Ganore/Virgaon	Chaufula	Daund	2008-04-08	till rains	first time	50	0	0	Diwali 07	0		na			3	1			1			y			5	y	y	y	n	n	n	n		y							n
Dh21	2008-04-23	Ganore/Virgaon	Vankunte Palashi	Parner	Nov - 07	till rains	6	180	20	30	Diwali 07	10		did not ask			3				3			y			20	y	y	y	n	n	n	n							applied last time and did not get	6	n
Dh22	2008-04-23	Ganore/Virgaon	Vankunte Palashi	Parner	Nov - 07	till rains	6	180	20	31	Diwali 07	11		did not ask			3				2			y			20	y	y	y	n	n	n	n							applied last time and did not get	always	n
Dh23	2008-04-23	Ganore/Virgaon	Vankunte Palashi	Parner	2008-01-08	Till rains	6	200	20	20	Diwali 07	4		thrown			3	1	1		2			y			did not ask	y	y	y	n	n	n	n		y						always	n		y
Dh24	2008-04-23	Ganore/Virgaon	Sakor		2008-01-08	Till rains	5	250	15	20	Diwali 07	0		did not ask	did not ask about fate of carcass because it did not seem like they remembered.		3				2			y			40	y	y	y	n	n	n	n		y	y					always	n		y
Dh25	2008-04-23	Ganore/Virgaon	Sakor		2008-01-08	till rains	3	200	40	20	Diwali 07	4					3	1			3	one month back a big dog was attacked by leopard but rescued		y			did not ask	y	y	y	n	n	n	n		y						always	n		y
Dh26	2008-04-25	Sugaon	Purandar	Rajuri	2008-01-08	May 08	5	100	50	40	Diwali 07	2		bury then			4				2	both taken by leopards even though they had collars	5			non commital	4	y	y	y	n	n	n	n		y			y			5	y
Dh27	2008-04-24	Pansarwadi	Vankunte Palashi	Parner	Nov - 07	till rains	5	100	10	50	Diwali 07	0		bury then			3	1			3		2	y			6	y	y	y	n	n	n	y				y			lots of expenses to get it done	5	y
Dh28	2008-04-24	Pansarwadi	Vankunte Palashi	Parner	Nov - 07	till rains	5	200	10	100	Diwali 07	2	one horse injured by leopard 10 days back (I have photo of that horse)	bury then			4				1		5				6	y	y	y	n	n	n	y				y			lots of expenses to get it done	5	y
Dh29	2008-04-25	Sugaon BK	Shirapur	Sangamner	2008-01-08	till rains	> 20	60	8	10	Diwali 07	4		bury then				1			2					non commital	6	y	y	y	n	n	n	n		y						8	n		y
Dh30	2008-04-25		Khor	Daund	Nov - 07	till rains	5	400	10	20	Diwali 07	5		throw or bury			3				3					non commital	4	y	y	y	n	n	n	n					y		lots of expenses to get it done	always	n		y
Dh31	2008-04-25		Pondh	Purandhar	Nov - 07	till rains		150	8	12	Diwali 07	2		throw or bury			2				3					non commital	4	y	y	y	n	n	n	n					y		lots of expenses to get it done	always	n		y
[truncated: 4 more columns]

## Sheet: Random sampled
Sr. No	Grid	village name	date of interview	n > 14 yrs in house	n < 14 yrs in house	comment	in last one year						no animals have died if the column is not filled										in last one year			total animals they owned of which x animals died is how it is expressed in the sheet
							buffalo owned	buffalo died	reason buffalo died	market value at time of death	fate of carcass after death	bulls owned	bulls died	reason bull died	market value at time of death	fate of carcass after death	cows owned	cows died	reason cows died	market value at time of death	fate of carcass after death	calves owned	calves died	reason calves died	market value at time of death	fate of carcass after death	sheep owned	sheep died	reason sheep died	market value at time of death	fate of carcass after death	goats owned	goats died	reason goat died	market value at time of death	fate of carcass after death	dogs owned	dogs died	reason dogs died	market value at time of death	fate of carcass after death	dogs taken	in how many years	chickens owned	chickens died	reasons chickens died	market value at time of death	fate of carcass after death	cats owned
RI 11	B7	Indori	2008-04-30	4	1							1	1	new born died		buried	2					1																											4
RI 12	B5	Indori	2008-04-30	2	2	did 118 instead of 111 (no one in 111)											1															9												7
RI 13	A3	Mehenduri	2008-04-30	4	0	goat taken 4/5 years back						3					4					1										3
RI 14	A2	Palatwadi - Mehenduri	2008-04-30	7	3																	1										3												6
RI 15	C7	Aurangpur	2008-05-01	4	0	2 years back calf taken											1					1
RI 16	C8	Ambad	2008-05-01	4	2	4 - 5 years back 2 dogs were taken. Leopards do not allow people to keep dogs						1					2					2	1	illness		thrown						1																	1
RI 17	B9	Ambad	2008-05-01	7	0	2 years back dog taken											2					1																						12
RI 18	B10	Ambad	2008-05-01	10	0	leopard is around as we can see from pugmarks but no attacks											10					4										4																	4
RI 19	A9	Ambad	2008-05-01	5	0							2					1															1																	1
RI 20	A9	Nirgudwadi	2008-05-01	6	6												1					3										4
RI 21	C4	Uncakadaq	2008-10-23	7	0												2															2																	1
RI 22	F2	Dokri	2008-10-23	5	0							2					2					2										1																	2
RI 23	D4	Uncakadaq KH	2008-10-23	6	4												4					3	1	illness		buried						1					1							11					2
RI 24	D2	Dokri - Ambikanagar	2008-10-23	6	5												2					2															1												1
RI 25	C3	Unchakadaq Thakkarwadi	2008-10-23	4	2							2					1															2												8
RI 26	F4	Dokri	2008-10-23	5	0		1					1					10					3															1							2					4
RI 27	C3	Unchakadaq Thakkarwadi	2008-10-23	4	4																											5												3					1
RI 28	F3	Dokri	2008-10-23	7	0												1					2																											1
RI 29	F3	Dokri	2008-10-23	4	3												1					1	1	do not know reason		buried
RI 30	D7	Aurangpur	2008-10-24	7	1												3					2	2	because of illness																									3
RI 31	F5	Navlewadi Mhalijap	2008-10-24	8	6		2					4					3					8	1	disease		buried						8					2							11					2
RI 32	F5	Uncakadaq	2008-10-24	4	1												3					1										3					1												1
RI 33	D4	Unchakadaq BK	2008-10-24	3	2												2	1	illness		buried	2										not kept goats because of leopards																	2
RI 34	C6	Uncakadaq	2008-10-24	5	1												6					2																											2
RI 35	C5	Indori	2008-10-24	4	0		0					0					0					0										0					0							0					0
RI 36	D6	Aurangpur	2008-10-24	3	3		0					0					0					0										0					0							0					0
RI 37		Dhumalwadi	2009-01-22	2	2							2					3	1	illness		buried	2															1	1	rabies										2
RI 38	B11	Pacha Thembe (Ambad)	2009-01-22	2	0																											15	3	illness and young
RI 39		Ambad	2009-01-22	4	2												1	1	drowned													3	1	killed by leopard		buried													1
RI 40	C9	Ambad	2009-11-22	3	2																						4	1	illness		buried													3	2	taken by leopard			1
RI 41	C10	Dhamangaon	2009-01-22	3	2							2										2										5																	1
RI 42	D8	Talewadi	2009-01-22	6	1																											5	2	died suddenly		buried
RI 43	F9	Dhamangaon	2009-01-22	7	7							2					5					1					1										1	1	leopard took away. He was sleeping outside house and dog was underneath the cot. 3.30 am. There was a light and he saw the leopard taking the dog away										2
RI 44	D9	Dhamangaon	2009-01-22	3	1							2					1					2															1	1	leopard took away. Suddenly not there one morning
RI1	B6	Indori	2008-04-30	6	4	no one at 18/74 so took house 19/74											2	1	something frightened her in the night and she fell down and broke her legs - perhaps leopards came for her calf which was nearby	25000	buried beucase she has done good and they did not want her fed on by anything else.	3
RI10	A4	Rumbhodi	2008-04-30	5	3	8 - 10 backs chicken taken by leopard or hyaena	2					2					6					2										2					5	1	illness		buried	2	10	50	1	taken by hyanea or leopard		took away	6
RI2	B3	Bhoirwadi	2008-04-30	4	0	no one at 3/43 so did next house @ 55 of B3																										8	do not know											6	do not know				1
RI3	B4	Mehenduri	2008-04-30	5	0	was to do 51 but was onion shed so did house											3					3	1	illness								3										3	5						4
RI4	B3	Bhoirwadi	2008-04-30	10	3							2					1					1										2												1
RI5	A5	Rumbhodi	2008-04-30	4	0																											7																	1
RI6	B8	Ambad	2008-04-30	2	2	90 was onion shed did 91																																											1
RI7	A6	Rumbhodi	2008-04-30	3	2	25 was school did 28																																											1
RI8	A8	Rumbhodi	2008-04-30	3	1	do not keep dogs and goats because of leopards											1					1
RI9	A7	Rumbhodi	2008-04-30	6	2							4					1					1										4																	1
RI 45	H4	Takli	2009-05-25	6	4	none						2					4					6	3	illness		buried
RI 46	I4	Khanapur	2009-05-25	4	0																											15	1 attacked by leopard	did not die
RI 47	I3	Gardani	2009-05-25	4	2	none											8																				1												1
RI 48	H2	Takli	2009-05-25	4	0	none						1					1															1	2	rabid dog bite		buried
RI 49	I2	Takli	2009-05-25	5
RI 50	G2	Takli	2009-05-25	5	2							2					2	1	do not know		buried											3	1	do not know		buried													1
RI 51	G3	Takli	2009-05-25	5	2							2					4					1										3																	1
RI 52	G4	Takli	2009-05-25	2	2												2					1										40	7	do not know		buried	1												2
RI 53	H5	Agasti Agar	2009-05-25	6	2		4					2					1																				2												1
RI 54	F10	Dhamangaon Awari	2009-05-23	3	3																											1																	1
RI 55	G8		2009-05-23	10	9												4	1	not know													2	1	leopard		taken away by leopard	2	1	leopard		taken away by leopard								2
RI 56	F9	Dhamangaon Awari	2009-05-23	5	2							2					3					1										5					1
RI 57	F11	Dhamangaon Awari	2009-05-23	3	2							2					1															2					2	1	leopard		taken away by leopard
RI 58	D10	Dhamangaon Awari	2009-05-23	5	2							2					1
RI 59	H3	Takli	2009-05-25	3	3							1										1										2																	2
RI 60	J3	Gardani	2009-05-28	13	4							2					16															4					4	4	leopard										2
RI 61	J4	Khanapur	2009-05-29	2	3																											6	2	illness		buried
RI 62	J10	Parkatpur	2009-05-29	3	0																											1												11	9	leopard
RI 63	J2	Gardani	2009-05-29	2	4																											2
RI 64	J7	mahalaxmi Colony	2009-05-29	6	1												4															2																	2
RI 65	J8	Pansarwadi	2009-05-29
RI 66	J5	Rede	2009-05-29	4	0																																												3
RI 67	J6	Akole	2009-05-29	7	5
RI 68		Parkatpur	2009-05-29	6	3												5															3					3	2	leopard										2
RI 69	I11	Dhamangaon Awari	2009-05-29	3	0																											13	5	one due to leopard and 4 due to illness		buried								2
RI 70	I10	Pansarwadi	2009-05-29	8	5							2					1															1					1												2
RI 71	H 9	Dhumalwadi	2009-05-29	2	2							2	1	illness		thrown in odha	1																																1
RI 72	H 10	Dhamangaon Awari	2009-05-29	4	4																											3
RI 73	I 9	Pansarwadi	2009-05-29	6	6							2																				4
RI 74	I 8	Agasti Nagar	2009-05-26	5	2
RI 75	I 7	Shenkarmala	2009-05-26	6	3												5															5																	1
RI 76	C 19	Dhamangaon Awari	2009-05-26	6	1												2
RI 77	H 11	Dhamangaon Awari	2009-05-26	4	0																											3	2	illness		buried								7
[truncated: 51 more columns]
